# Supplementary material for: Family Mindfulness Training for Childhood ADHD: Short- and Long-Term Effects on Children, Fathers and Mothers
Source: Springer Nature journal article supplement (doi:10.1007/s12671-021-01761-y), 2021-10-05

Supplementary materials:

*Figure III*: Paternal above or below threshold ADHD symptoms predicting fathers’ own ADHD symptoms outcome.

*
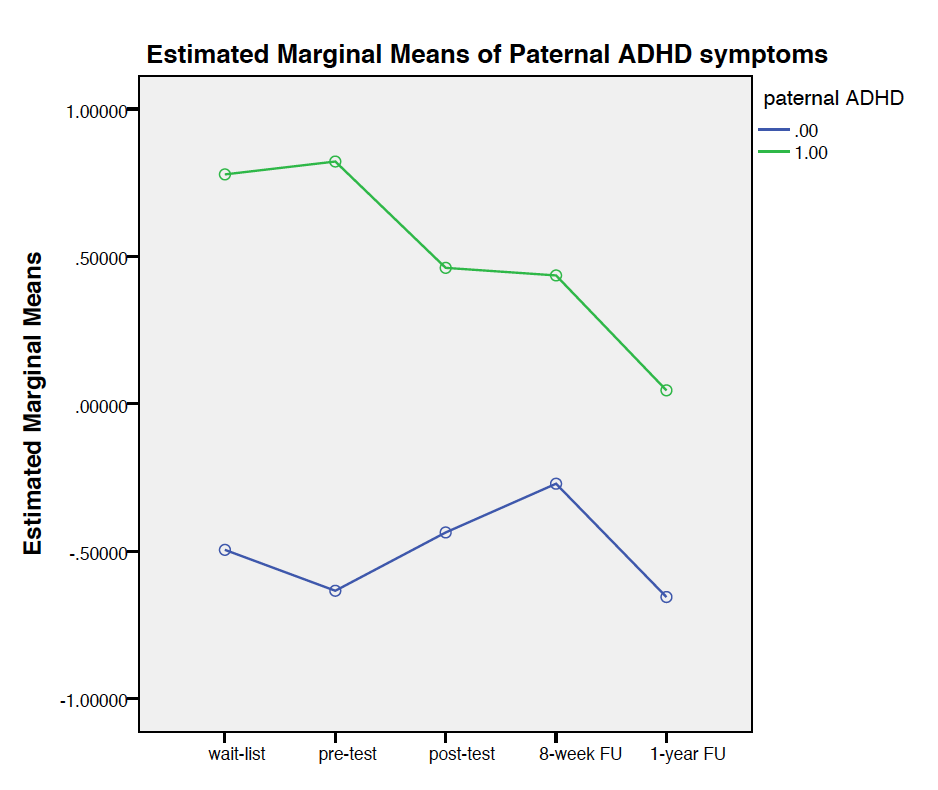
*

*Figure IV*: Maternal above or below threshold ADHD symptoms predicting mothers’ own ADHD symptoms outcome
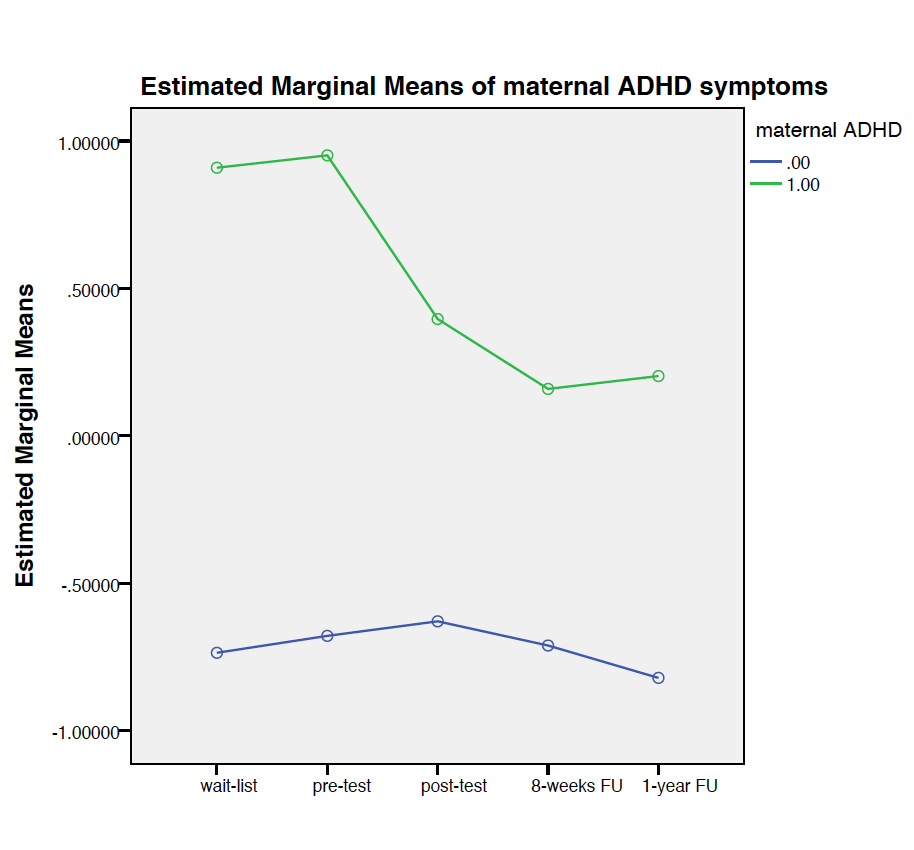

Supplement: MOESM1 [file 19730802]
